# Supplementary material
Source: PubMed Central journal article supplement (PMC6343195)
Supplement: Supp_Fig1.pdf [file Supp_Fig1.pdf]

## Supplementary Data

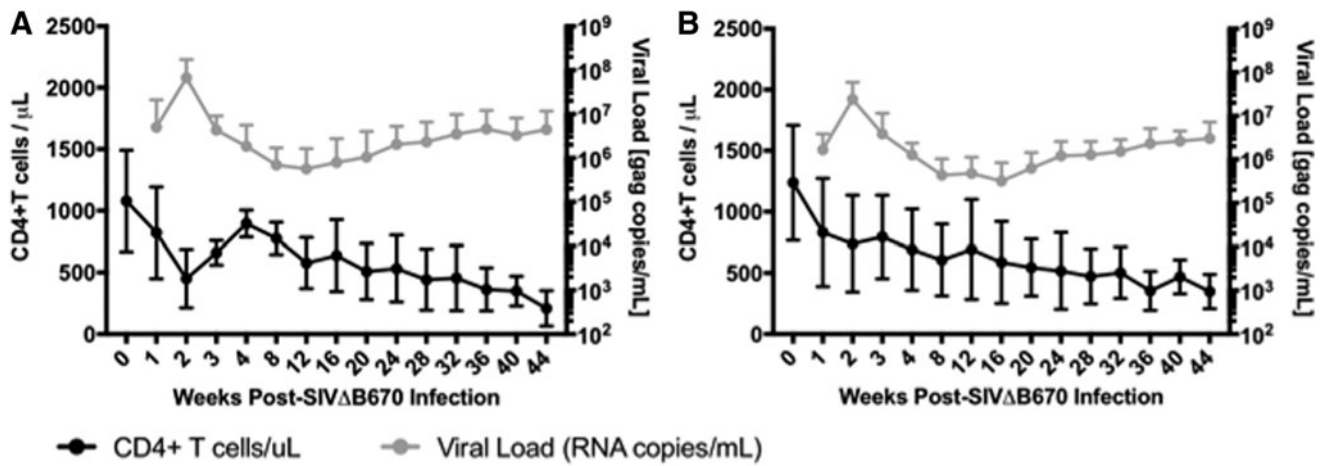

**SUPPLEMENTARY FIG. S1.** Comparison of CD4+ T cell numbers and plasma viral loads for (A) PAH- and (B) PAH+ animals. PAH, pulmonary arterial hypertension.
