# Supplementary material
Source: PubMed Central journal article supplement (PMC6343195)
Supplement: Supp_Fig2.pdf [file Supp_Fig2.pdf]

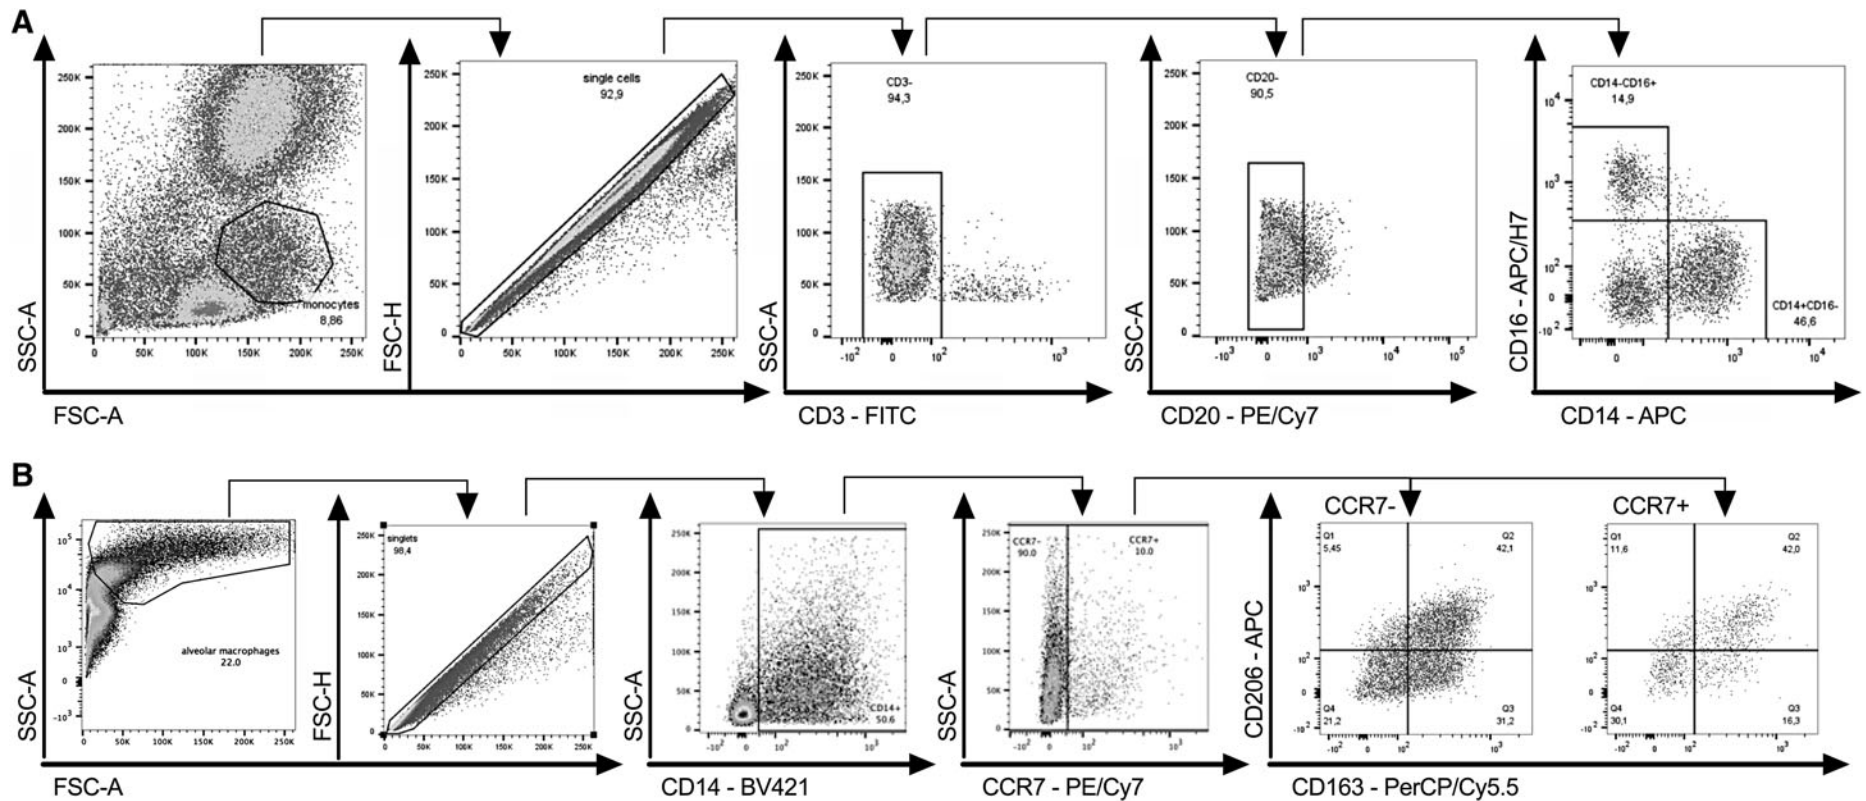

**SUPPLEMENTARY FIG. S2.** Gating strategy for (A) peripheral blood monocytes and (B) alveolar BALF macrophages. and -plots were used to isolate the monocyte and macrophage population respectively. For all flow cytometric experiments FSC-A and FSC-H was used to only include single cells in the analysis. For the evaluation of monocyte phenotypes, CD3-CD20- cells were characterized by their expression of CD14 and CD16, with the help of controls. CD14-CD16- and CD14dimCD16+ cells were quantified. Macrophages were identified as CD14+ and the differential expression of CCR7, CD163, and CD206. CD14+CCR7+CD163-CD206-, CD14+CCR7-CD163-CD206+, and CD14+CCR-CD163+CD206- cells were quantified. BALF, bronchoalveolar lavage fluid; FMO, fluorescence minus one; FSC-A, forward scatter-area; SSC-A, side scatter-area.
