# Supplementary material
Source: PubMed Central journal article supplement (PMC6343195)
Supplement: Supp_Table1.pdf [file Supp_Table1.pdf]

SUPPLEMENTARY TABLE S1. CLINICAL PARAMETERS OF 21 RHESUS MACAQUES INCLUDED IN THE STUDY

|                         | <i>Gender</i>                           | <i>Age at infection (years)</i> | <i>Weight at infection (kg)</i> | <i>BL blood pressure (mmHg)</i> | <i>Chronic CD4 T cell count (cells/<math>\mu</math>L)</i> | <i>Viral set point (copies/mL)</i>      | <i>Peak viral load (copies/mL)</i>       | <i>Baseline RVSP (mmHg)</i> | <i>Peak RVSP (mmHg)</i> |
|-------------------------|-----------------------------------------|---------------------------------|---------------------------------|---------------------------------|-----------------------------------------------------------|-----------------------------------------|------------------------------------------|-----------------------------|-------------------------|
| <b>NHP (PAH-)</b>       |                                         |                                 |                                 |                                 |                                                           |                                         |                                          |                             |                         |
| 2,913                   | Female                                  | 4.74                            | 6                               | 110/50                          | 730.95                                                    | $2.75 \times 10^5$                      | $3.20 \times 10^6$                       | 19.66                       | 34.65                   |
| 3,013                   | Female                                  | 6.13                            | 7                               | 110/60                          | 329.77                                                    | $6.70 \times 10^4$                      | $2.00 \times 10^7$                       | 30.23                       | 30.23                   |
| 3,113                   | Female                                  | 6.67                            | 5                               | 100/75                          | 885.81                                                    | $1.17 \times 10^7$                      | $3.60 \times 10^8$                       | 25.30                       | 30.87                   |
| 3,513                   | Female                                  | 4.73                            | 7.4                             | 110/60                          | 274.05                                                    | $3.54 \times 10^5$                      | $1.10 \times 10^8$                       | 21.02                       | 35.62                   |
| 3,613                   | Female                                  | 4.72                            | 7                               | 110/70                          | 312.18                                                    | $2.68 \times 10^6$                      | $1.40 \times 10^7$                       | 26.99                       | 32.07                   |
| 6,513                   | Male                                    | 5.78                            | 11.8                            | N/A <sup>a</sup>                | 690.11                                                    | $1.86 \times 10^5$                      | $1.70 \times 10^7$                       | 25.50                       | 32.01                   |
| 10,413                  | Male                                    | 5.80                            | 8.8                             | 110/75                          | 397.09                                                    | $1.17 \times 10^7$                      | $1.20 \times 10^8$                       | 28.60                       | 31.51                   |
| 10,713                  | Male                                    | 6.86                            | 6.8                             | 135/95                          | 377.77                                                    | $1.08 \times 10^6$                      | $1.20 \times 10^6$                       | 26.64                       | 31.64                   |
| 11,313                  | Male                                    | 5.79                            | 8                               | 140/80                          | 679.10                                                    | $2.19 \times 10^2$                      | $1.00 \times 10^7$                       | 34.99                       | 34.99                   |
| 11,413                  | Male                                    | 5.84                            | 8.8                             | 130/70                          | 188.29                                                    | $7.93 \times 10^5$                      | $7.10 \times 10^6$                       | 27.13                       | 28.18                   |
| Mean values ( $\pm$ SD) | Female <i>n</i> =5;<br>male <i>n</i> =5 | $6.71 \pm 0.77$                 | $7.66 \pm 1.87$                 | $117/71 \pm 13.94/13.10$        | $486.51 \pm 237.25$                                       | $2.88 \times 10^6 \pm 4.17 \times 10^6$ | $6.63 \times 10^7 \pm 11.22 \times 10^7$ | $26.61 \pm 4.35$            | $32.18 \pm 2.31$        |
| <b>NHP (PAH+)</b>       |                                         |                                 |                                 |                                 |                                                           |                                         |                                          |                             |                         |
| 17,511                  | Male                                    | 7.25                            | 11.8                            | 140/80                          | 412.92                                                    | $3.50 \times 10^4$                      | $4.80 \times 10^6$                       | 30.96                       | 56.52                   |
| 17,611                  | Male                                    | 7.06                            | 10.8                            | 120/70                          | 127.99                                                    | $1.05 \times 10^6$                      | $1.10 \times 10^7$                       | 22.19                       | 37.85                   |
| 18,011                  | Male                                    | 7.86                            | 10.2                            | 110/50                          | 733.18                                                    | $2.13 \times 10^5$                      | $2.60 \times 10^6$                       | 27.00                       | 55.25                   |
| 18,211                  | Male                                    | 8.25                            | 12.4                            | 160/100                         | 371.84                                                    | $1.28 \times 10^6$                      | $1.00 \times 10^7$                       | 19.91                       | 48.34                   |
| 18,311                  | Male                                    | 7.17                            | 11.6                            | N/A <sup>a</sup>                | 442.54                                                    | $9.54 \times 10^5$                      | $7.30 \times 10^6$                       | 26.95                       | 41.45                   |
| 2,813                   | Female                                  | 6.59                            | 6.2                             | 100/60                          | 676.52                                                    | $1.79 \times 10^4$                      | $1.20 \times 10^7$                       | 23.21                       | 38.34                   |
| 3,213                   | Female                                  | 5.30                            | 6.4                             | 110/70                          | 296.94                                                    | $2.06 \times 10^6$                      | $2.40 \times 10^7$                       | 28.05                       | 42.00                   |
| 3,313                   | Female                                  | 6.12                            | 8                               | 110/70                          | 700.83                                                    | $1.96 \times 10^6$                      | $4.40 \times 10^7$                       | 27.21                       | 39.34                   |
| 3,413                   | Female                                  | 4.90                            | 5.4                             | 120/65                          | 439.67                                                    | $5.87 \times 10^5$                      | $3.90 \times 10^7$                       | 18.42                       | 52.56                   |
| 10,613                  | Male                                    | 5.68                            | 7.2                             | 130/80                          | 448.86                                                    | $3.32 \times 10^6$                      | $3.80 \times 10^6$                       | 33.73                       | 46.99                   |
| 11,613                  | Male                                    | 5.90                            | 7.4                             | 130/80                          | 446.93                                                    | $2.15 \times 10^6$                      | $1.20 \times 10^8$                       | 32.51                       | 39.59                   |
| Mean values ( $\pm$ SD) | Female <i>n</i> =4;<br>male <i>n</i> =7 | $6.55 \pm 1.07$                 | $8.85 \pm 2.55$                 | $123/73 \pm 17.67/13.59$        | $463.47 \pm 180.89$                                       | $1.24 \times 10^6 \pm 1.04 \times 10^6$ | $2.53 \times 10^7 \pm 3.44 \times 10^7$  | $26.38 \pm 5.00$            | $45.29 \pm 6.98$        |

BL, baseline; NHP, nonhuman primate; PAH, pulmonary arterial hypertension; RVSP, right ventricular systolic pressure; SD, standard deviation.

<sup>a</sup>Data not available.
