# Supplementary material
Source: PubMed Central journal article supplement (PMC6343195)
Supplement: Supp_Table2.pdf [file Supp_Table2.pdf]

SUPPLEMENTARY TABLE S2. SUMMARY OF CYTOKINES, CHEMOKINES, GROWTH FACTORS, AND ACUTE PHASE PROTEIN QUANTIFIED IN LONGITUDINAL PLASMA AND BRONCHOALVEOLAR LAVAGE FLUID SAMPLES

| <i>Cytokine</i> | <i>Chemokine</i>     | <i>Growth factor</i> | <i>Acute phase protein</i> |
|-----------------|----------------------|----------------------|----------------------------|
| IL-1 $\beta$    | Eotaxin/CCL11        | EGF                  | CRP                        |
| IL-1RA          | IL-8                 | FGF-basic            |                            |
| IL-2            | MCP-1/CCL2           | HGF                  |                            |
| IL-4            | MDC/CCL22            | VEGF                 |                            |
| IL-5            | MIF                  | TGF- $\beta$         |                            |
| IL-6            | MIG/CXCL9            |                      |                            |
| IL-10           | MIP-1 $\alpha$ /CCL3 |                      |                            |
| IL-12           | MIP-1 $\beta$ /CCL4  |                      |                            |
| IL-15           | I-TAC/CXCL11         |                      |                            |
| IL-17           | RANTES/CCL5          |                      |                            |
| G-CSF           |                      |                      |                            |
| GM-CSF          |                      |                      |                            |
| IFN- $\gamma$   |                      |                      |                            |
| IP-10/CXCL10    |                      |                      |                            |
| TNF- $\alpha$   |                      |                      |                            |

CCL, C-C motif chemokine ligand; CXCL, C-X-C motif chemokine ligand; EGF, epidermal growth factor; FGF, fibroblast growth factor; G-CSF, granulocyte-colony stimulating factor; GM-CSF, granulocyte-macrophage colony-stimulating factor; HGF, hepatocyte growth factor; IFN, interferon; IL, interleukin; IP, IFN- $\gamma$ -inducible protein; I-TAC, interferon-inducible T-cell alpha chemoattractant; MCP, monocyte chemoattractant protein; MDC, macrophage-derived chemokine; MIF, macrophage migration inhibitory factor; MIG, monokine induced by gamma interferon; MIP, macrophage inflammatory protein; RA, receptor antagonist; RANTES, regulated on activation, normal T cell expressed and secreted; TGF, transforming growth factor.; TNF, tumor necrosis factor; VEGF, vascular endothelial growth factor.
