# Supplementary material
Source: PubMed Central journal article supplement (PMC6343195)
Supplement: Supp_Table3.pdf [file Supp_Table3.pdf]

SUPPLEMENTARY TABLE S3. QUANTIFICATION OF CD68+STAT+, CD68+STAT3+, AND CD68+STAT6+ MACROPHAGES AND INTERLEUKIN-10+ CELLS BY IMMUNOHISTOCHEMISTRY

|                   | <i>No. of<br/>20× fields</i> | <i>No. of<br/>CD68+<br/>cells</i> | <i>No. of<br/>STAT1+<br/>CD68+</i> | <i>Percentage<br/>of STAT1+/<br/>CD68+</i> | <i>No. of<br/>20× fields</i> | <i>No. of<br/>CD68+<br/>cells</i> | <i>No. of<br/>STAT3+<br/>CD68+</i> | <i>Percentage<br/>of STAT3+/<br/>CD68+</i> | <i>No. of<br/>20× fields</i> | <i>No. of<br/>CD68+<br/>cells</i> | <i>No. of<br/>STAT6+<br/>CD68+</i> | <i>Percentage<br/>of STAT6+/<br/>CD68+</i> | <i>No. of<br/>IL-10+<br/>cells in<br/>20× fields</i> |
|-------------------|------------------------------|-----------------------------------|------------------------------------|--------------------------------------------|------------------------------|-----------------------------------|------------------------------------|--------------------------------------------|------------------------------|-----------------------------------|------------------------------------|--------------------------------------------|------------------------------------------------------|
| <b>NHP (PAH-)</b> |                              |                                   |                                    |                                            |                              |                                   |                                    |                                            |                              |                                   |                                    |                                            |                                                      |
| 2,913             | 24                           | 83                                | 23                                 | 27.71                                      | N/A                          | N/A                               | N/A                                | N/A                                        | 21                           | 43                                | 32                                 | 75.03                                      | 35                                                   |
| 3,013             | 19                           | 86                                | 20                                 | 22.81                                      | 16                           | 80                                | 28                                 | 34.59                                      | 21                           | 93                                | 59                                 | 63.58                                      | 63                                                   |
| 3,113             | 24                           | 120                               | 31                                 | 25.94                                      | 9                            | 119                               | 21                                 | 17.23                                      | 21                           | 140                               | 78                                 | 55.63                                      | 78                                                   |
| 3,513             | 21                           | 85                                | 21                                 | 24.71                                      | 14                           | 59                                | 14                                 | 23.73                                      | 21                           | 86                                | 62                                 | 71.82                                      | 71                                                   |
| 3,613             | 22                           | 254                               | 61                                 | 23.87                                      | 13                           | 125                               | 36                                 | 28.92                                      | 21                           | 230                               | 125                                | 54.37                                      | 40                                                   |
| 6,513             | 20                           | 159                               | 24                                 | 14.78                                      | 11                           | 64                                | 11                                 | 17.32                                      | 20                           | 66                                | 50                                 | 75.89                                      | 46                                                   |
| 10,413            | 18                           | 225                               | 57                                 | 25.17                                      | 10                           | 83                                | 16                                 | 19.28                                      | 20                           | 77                                | 55                                 | 71.32                                      | 34                                                   |
| 10,713            | 21                           | 304                               | 73                                 | 24.05                                      | 12                           | 166                               | 41                                 | 24.40                                      | 21                           | 277                               | 120                                | 43.56                                      | 23                                                   |
| 11,313            | 21                           | 116                               | 29                                 | 24.68                                      | N/A                          | N/A                               | N/A                                | N/A                                        | 21                           | 57                                | 43                                 | 74.68                                      | 21                                                   |
| 11,413            | 19                           | 144                               | 54                                 | 37.63                                      | 12                           | 93                                | 22                                 | 23.24                                      | 20                           | 114                               | 81                                 | 71.32                                      | 71                                                   |
| Mean values (±SD) | 20.90±2.02                   | 157.60±77.86                      | 39.30±19.77                        | 25.14±5.57                                 | 12.13±2.23                   | 98.63±35.94                       | 23.63±10.65                        | 23.59±5.96                                 | 20.70±0.48                   | 118.30±77.25                      | 70.50±31.07                        | 65.72±11.04                                | 48.20±21.00                                          |
| <b>NHP (PAH+)</b> |                              |                                   |                                    |                                            |                              |                                   |                                    |                                            |                              |                                   |                                    |                                            |                                                      |
| 17,511            | 22                           | 149                               | 45                                 | 29.97                                      | 16                           | 91                                | 34                                 | 37.57                                      | 20                           | 153                               | 58                                 | 38.05                                      | 18                                                   |
| 17,611            | 20                           | 88                                | 41                                 | 46.29                                      | N/A                          | N/A                               | N/A                                | N/A                                        | 20                           | 187                               | 71                                 | 38.08                                      | 7                                                    |
| 18,011            | 21                           | 91                                | 23                                 | 25.41                                      | N/A                          | N/A                               | N/A                                | N/A                                        | 21                           | 188                               | 90                                 | 47.75                                      | 17                                                   |
| 18,211            | 19                           | 55                                | 21                                 | 38.18                                      | 10                           | 120                               | 30                                 | 25.10                                      | 20                           | 147                               | 73                                 | 49.39                                      | 67                                                   |
| 18,311            | 21                           | 118                               | 42                                 | 35.17                                      | N/A                          | N/A                               | N/A                                | N/A                                        | 19                           | 221                               | 106                                | 47.77                                      | 32                                                   |
| 2,813             | 22                           | 113                               | 30                                 | 26.67                                      | 14                           | 100                               | 37                                 | 36.68                                      | 21                           | 130                               | 63                                 | 48.10                                      | 5                                                    |
| 3,213             | 20                           | 128                               | 40                                 | 30.98                                      | 12                           | 66                                | 26                                 | 39.69                                      | 21                           | 200                               | 116                                | 57.95                                      | 18                                                   |
| 3,313             | 18                           | 90                                | 26                                 | 28.49                                      | 10                           | 85                                | 35                                 | 41.18                                      | 20                           | 123                               | 66                                 | 53.21                                      | 68                                                   |
| 3,413             | 21                           | 120                               | 49                                 | 41.00                                      | 10                           | 77                                | 31                                 | 40.26                                      | 20                           | 54                                | 31                                 | 56.48                                      | 30                                                   |
| 10,613            | 5                            | 27                                | 9                                  | 33.96                                      | N/A                          | N/A                               | N/A                                | N/A                                        | 21                           | 178                               | 77                                 | 43.40                                      | 19                                                   |
| 11,613            | 21                           | 114                               | 43                                 | 37.72                                      | N/A                          | N/A                               | N/A                                | N/A                                        | 20                           | 126                               | 71                                 | 55.90                                      | 27                                                   |
| Mean values (±SD) | 19.09±4.83                   | 99.00±34.55                       | 33.32±12.42                        | 33.99±6.45                                 | 12.00±2.53                   | 89.50±18.73                       | 32.08±3.85                         | 36.75±5.95                                 | 20.27±0.65                   | 155.00±46.53                      | 74.41±23.19                        | 48.73±6.90                                 | 28.00±21.25                                          |

STAT, signal transducer and activator of transcription.
